# Supplementary material for: Phosphorene nano-heterostructure based memristors with broadband response synaptic plasticity
Source: Royal Society of Chemistry journal article supplement (doi:10.1039/c8tc03089h), 2018-01-01
Supplement: c8tc03089h1.pdf [file c8tc03089h1.pdf]

## Supporting information

### Phosphorene nano-heterostructure based memristor with broadband response synaptic plasticity

Yi Ren,<sup>a</sup> Liang Hu,<sup>b</sup> Jing-Yu Mao,<sup>a</sup> Jun Yuan,<sup>b</sup> Yu-Jia Zeng,<sup>\*b</sup> Shuangchen Ruan,<sup>b</sup>  
Jia-Qin Yang,<sup>a</sup> Li Zhou,<sup>a</sup> Ye Zhou,<sup>\*a</sup> and Su-Ting Han<sup>\*a</sup>

<sup>a</sup> Institute for Advanced Study and College of Electronic Science & Technology,  
Shenzhen University, Shenzhen, 518060, P. R. China. E-mail: yezhou@szu.edu.cn;  
sutinghan@szu.edu.cn

<sup>b</sup>Shenzhen Key Laboratory of Laser Engineering, College of Optoelectronic  
Engineering, Shenzhen University, Shenzhen, 518060, P. R. China. Email:  
yjzeng@szu.edu.cn

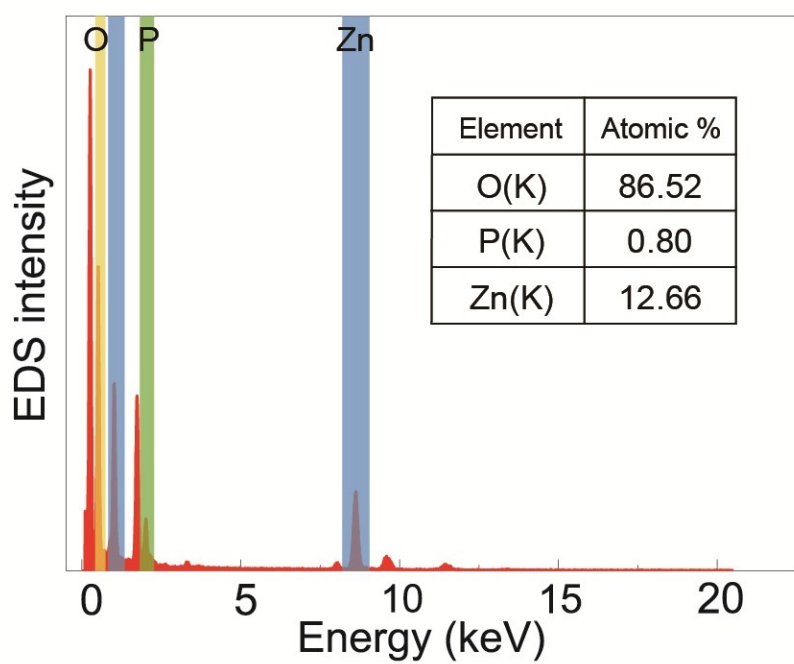

**Figure S1.** The typical EDS spectra of single ZP NP. The inset chart shows the atomic ratio of each element.

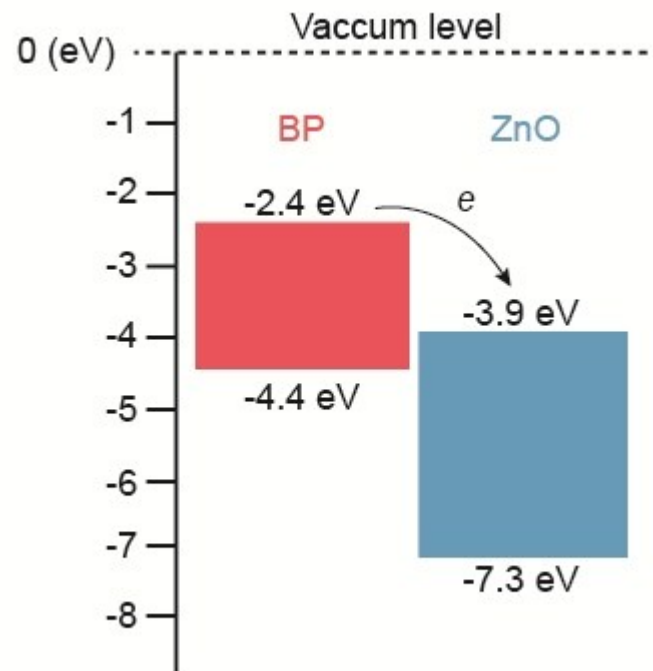

**Figure S2.** The type-II staggered band configuration of ZnO NPs and phosphorene (BP) QDs.

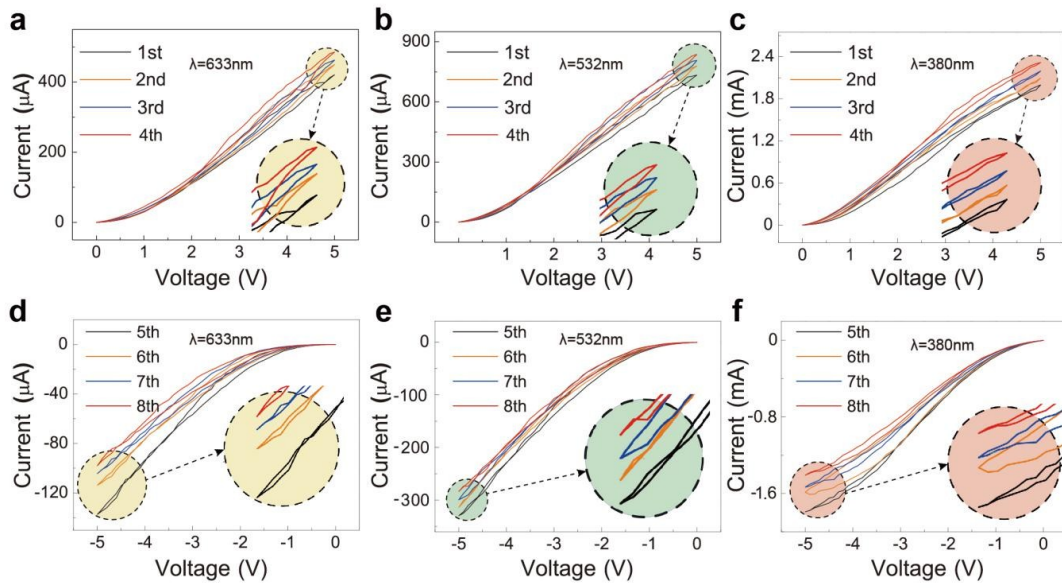

**Figure S3.** (a-c) I-V characteristics of the device showing gradual conductance enhancement by applying 4 consecutive positive sweeps after illumination with wavelength of 633 nm (a), 532 nm (b) and 380 nm (c). (d-f) I-V characteristics of the device showing gradual conductance depression by applying 4 consecutive negative sweeps after illumination with wavelength of 633 nm (d), 532 nm (e) and 380 nm (f).

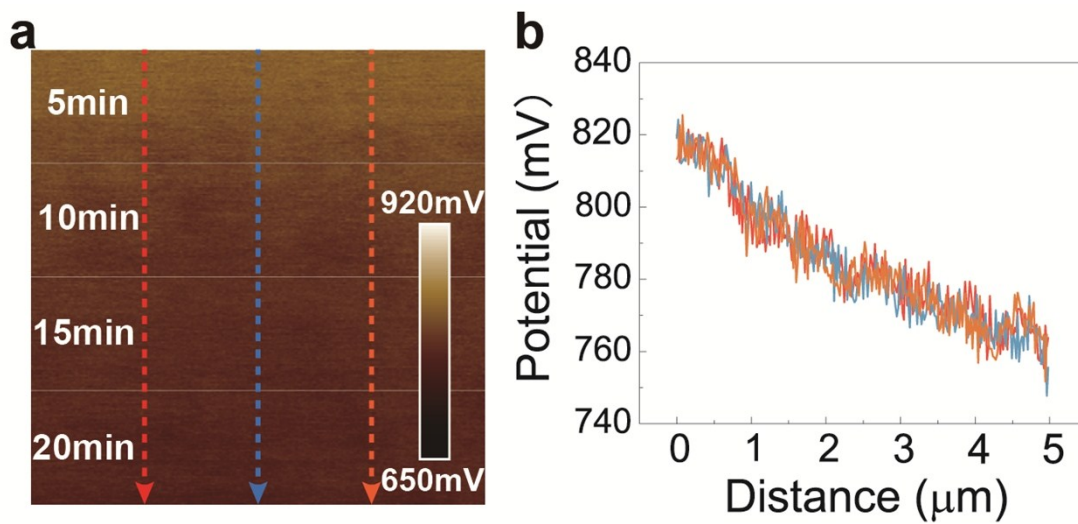

**Figure S4.** Potential change (a) after UV light illumination and (b) its dependence on the vertical distance recorded after 5, 10, 15 and 20 min.

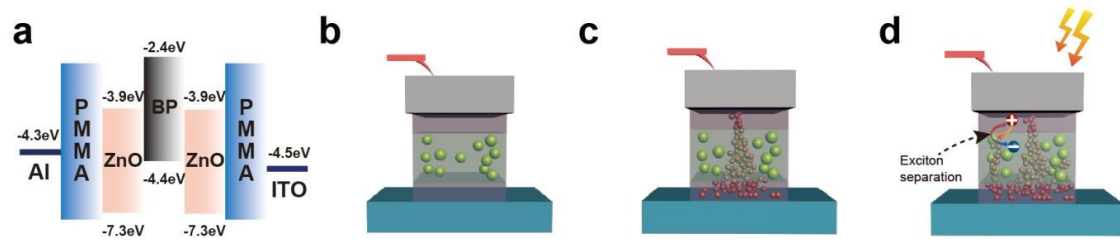

**Figure S5.** (a) Band alignment of device at initial state. (b-d) Illustration of device structure at the initial state (b), conduction filament forming process in the dark condition (c), and conduction filament forming under the illumination (d).

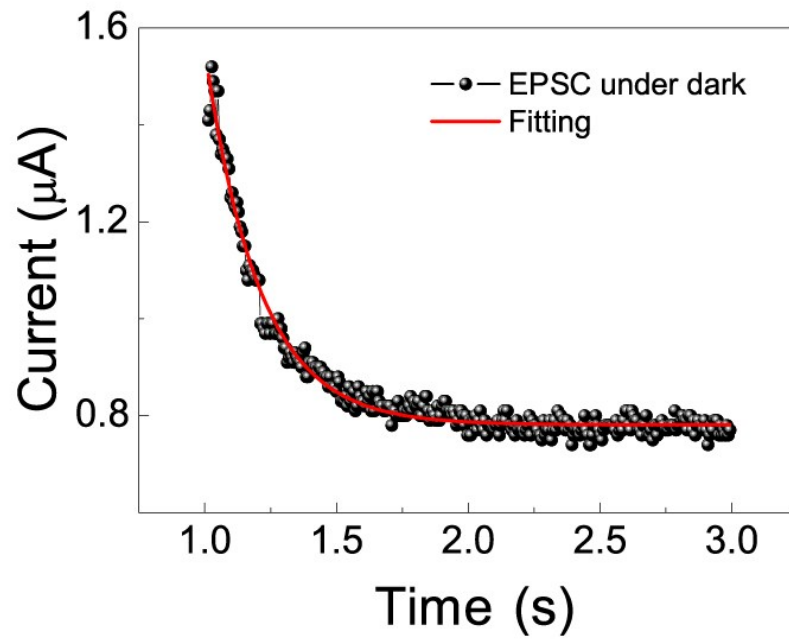

**Figure S6.** The exponential fitting data of EPSC in dark condition.  $I_0$ ,  $A$  and  $\tau$  corresponds to  $7.81\text{E-}7$  A,  $1\text{E-}4$  and  $0.21$  s, respectively.

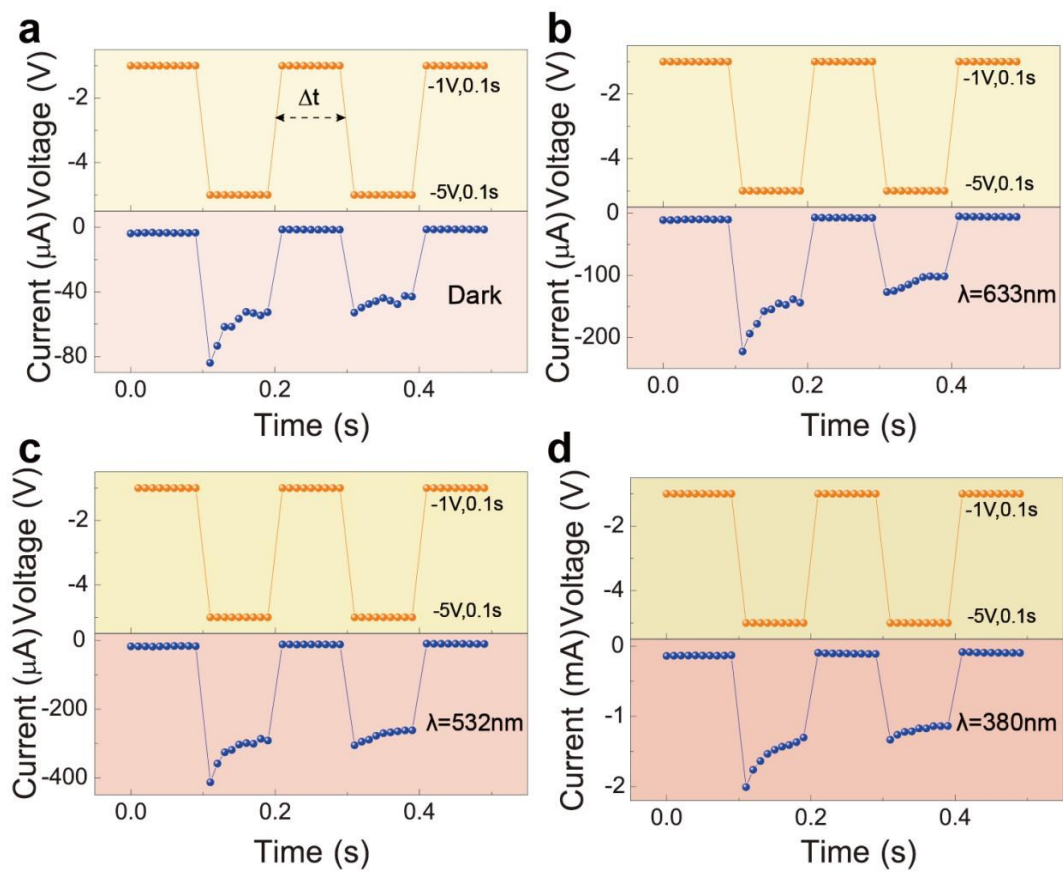

**Figure S7.** PPF (a) before and after illuminations with wavelength of (b) 633 nm, (c) 532 nm and (d) 380 nm by applying negative pulse trains.



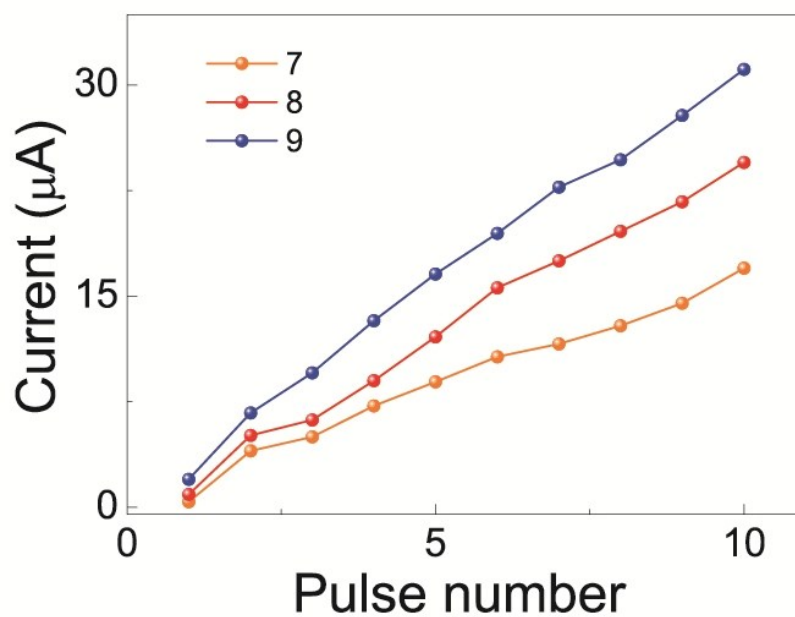

**Figure S8.** Conductance change of synaptic devices under 10 consecutive pulse trains with the base value of 1 V for 0.1 s and pulse amplitude of 5 V for 0.1 s. Different molar ratio of ZnO to phosphorene ranges from 7: 1 to 9: 1.

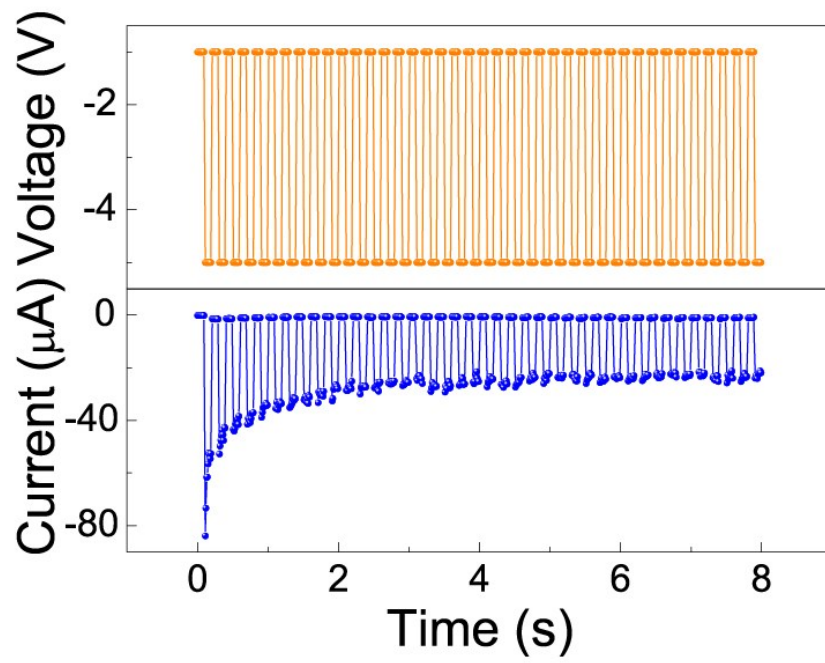

**Figure S9.** Conductance depression by consecutive 40 pulse trains in negative directions.

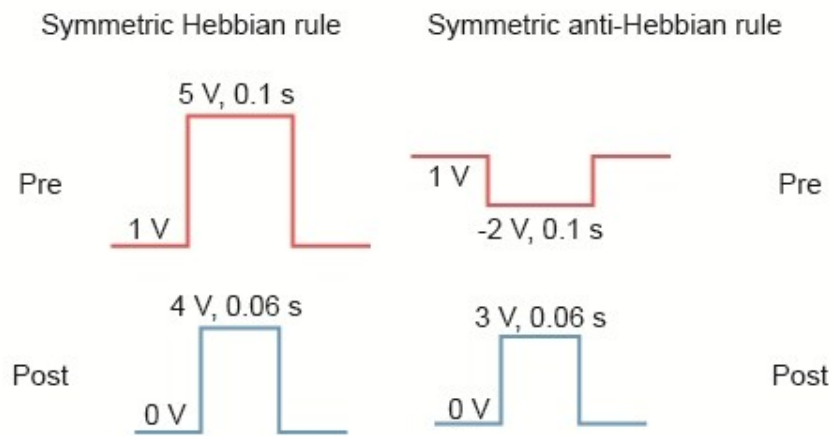

**Figure S10.** Pre- and post-synaptic spikes utilized to implement Symmetric Hebbian rule and Symmetric anti-Hebbian rule.

| N cycles | Interval 0.1s |         |         | Interval 0.01s |         |         |
|----------|---------------|---------|---------|----------------|---------|---------|
|          | $l_0$         | A       | $\zeta$ | $l_0$          | A       | $\zeta$ |
| 10       | 7.42E-7       | 1.83E-6 | 16.82   | 1.51E-6        | 9.05E-6 | 7.55    |
| 20       | 8.75E-7       | 2.21E-6 | 17.25   | 1.63E-6        | 1.11E-5 | 8.04    |
| 30       | 1.16E-6       | 4.37E-6 | 17.18   | 2.00E-6        | 1.17E-5 | 18.99   |
| 40       | 2.50E-6       | 1.53E-5 | 19.00   | 3.29E-6        | 1.19E-5 | 25.06   |
| 50       | 3.08E-6       | 1.54E-5 | 20.18   | 7.36E-6        | 1.31E-5 | 40.30   |
| 60       | 4.95E-6       | 2.39E-5 | 20.88   | 9.12E-6        | 1.41E-5 | 50.32   |

**Table S1.** Fitting results for Figure 4b-c.
